# Supplementary material
Source: PubMed Central journal article supplement (PMC2515598)

Supporting information:

Oxygenation monitoring of tissue vasculature by resonance Raman spectroscopy

Kevin R. Ward, R. Wayne Barbee, Penny S. Reynolds, Ivo P. Torres Filho,

M. Hakam Tiba, Luciana Torres, Roland N. Pittman and James Turner

Depts. of Anesthesiology, Chemistry, Emergency Medicine, and Physiology;

Virginia Commonwealth University; Richmond, VA 23298

Contents:

- 1) A table listing resonance Raman spectral assignments for forms of equine hemoglobin given in Figure 5 of the manuscript.
- 2) A figure containing resonance Raman spectra of horse heart myoglobin in the oxy, deoxy and metmyoglobin forms.

Table S-I. Resonance Raman band assignments based on forms of equine hemoglobin (manuscript Figure 5), obtained with 406.7 nm excitation.

| mode                    | Observed polarization | oxy Hb  | deoxy Hb | met Hb |
|-------------------------|-----------------------|---------|----------|--------|
| $\nu_{10}$ ( $b_{1g}$ ) | dp                    | 1642    | 1609     | 1610   |
| $\nu_{C=C}$ (p)         | p                     | 1623    | 1622     | 1623   |
| $\nu_{37}$ ( $e_u$ )    | p                     | 1608    |          | 1583   |
| $\nu_2$ ( $a_{1g}$ )    | p                     | 1585    | 1569     | 1564   |
| $\nu_{11}$ ( $b_{1g}$ ) | dp                    | 1564    | 1549     |        |
| $\nu_{38}$ ( $e_u$ )    | p                     | 1553    | 1527     | 1514   |
| $\nu_3$ ( $a_{1g}$ )    | p                     | 1507    | 1475     | 1481   |
| Vinyl                   | dp                    | 1481    |          |        |
| $\nu_{28}$ ( $b_{2g}$ ) | dp                    | 1428    | 1428     | 1426   |
| $\nu_{29}$ ( $b_{2g}$ ) | dp                    | 1398    | 1394     | 1401   |
| $\nu_{12}$ ( $b_{1g}$ ) | dp                    |         | 1391     | 1387   |
| $\nu_4$ ( $a_{1g}$ )    | p                     | 1378    | 1359     | 1371   |
| propionate $CH_2$ wag   |                       | 1286    | 1282     | 1283   |
| propionate $CH_2$ twist | dp                    | 1225    | 1225     |        |
| $\nu_{30}$ ( $e_u$ )    |                       | 1173 dp | 1175 p   | 1170   |
| $\nu_{14}$ ( $b_{1g}$ ) | dp                    | 1136    | 1132     | 1134   |
| $\nu_5$ ( $a_{1g}$ )    | p                     | 1120    | 1116     | 1123   |
| vinyl $CH_2$ rock       | p                     |         | 1088     |        |
| vinyl $CH_2$ rock       | dp                    |         | 1054     | 1061   |
| $\nu_{46}$ ( $e_u$ )    |                       | 940     |          |        |
| $\gamma_4$ ( $a_{1u}$ ) |                       | 830     | 826      |        |
| $\nu_{32}$ ( $b_{2g}$ ) |                       | 790     | 789      |        |
| $\nu_{15}$ ( $b_{1g}$ ) |                       | 749     | 747      |        |
| $\nu_7$ ( $a_{1g}$ )    | p                     | 674     |          | 674    |

Figure S-1. Resonance Raman spectra of forms of horse heart myoglobin (Mb) (Sigma, St Louis MO), pH 7.4, obtained with 5 mw of 406.7 nm excitation. a) oxyMb, b) deoxyMb, and c) metMb.

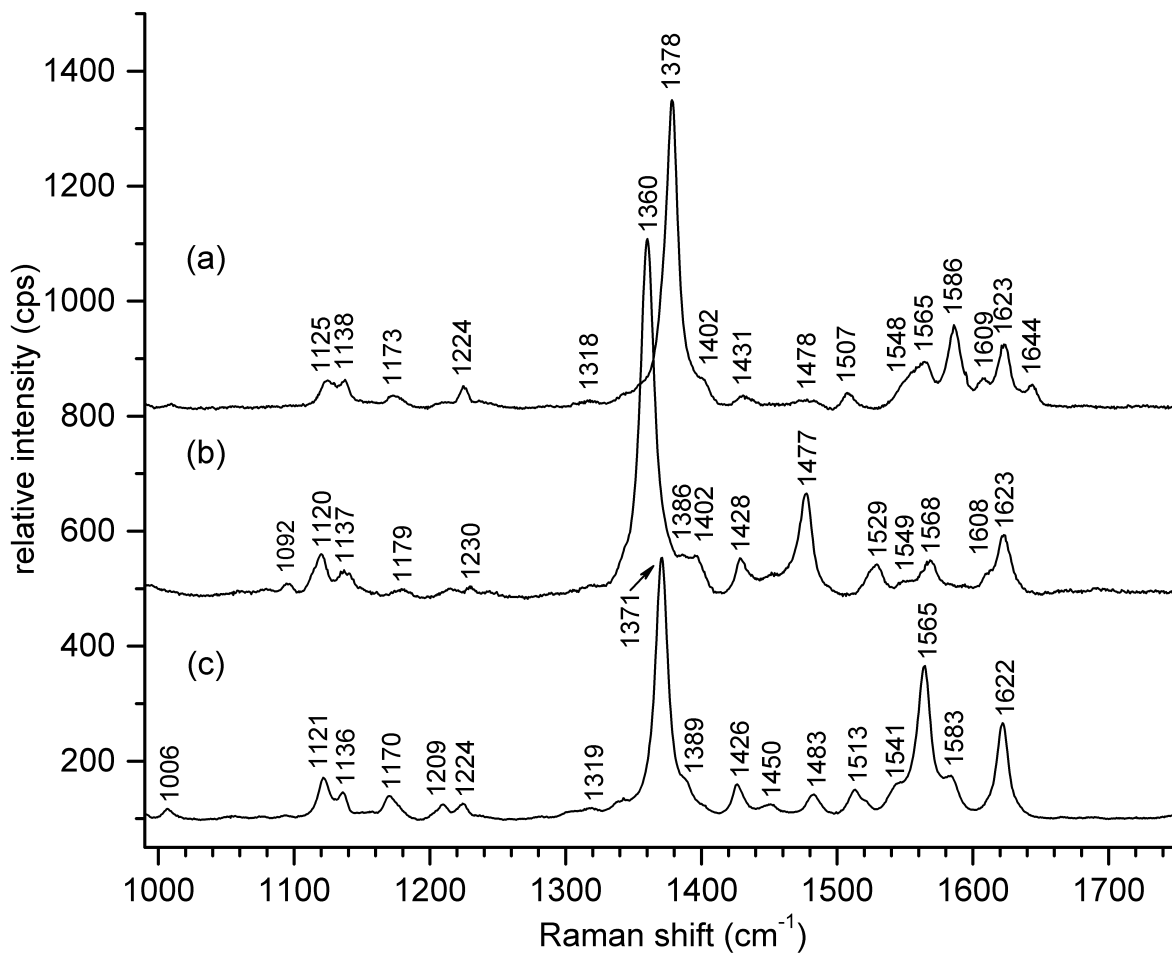

Supplement: NIHMS61832-supplement-si20061116_044.pdf [file NIHMS61832-supplement-si20061116_044.pdf]
